# Supplementary material for: Genomics Analyses of GIV and GVI Noroviruses Reveal the Distinct Clustering of Human and Animal Viruses
Source: MDPI journal article supplement (doi:10.3390/v11030204), 2019-03-01
Supplement: s1 [file s1]

**Supplemental Table 1.** List of human, canine, and feline noroviruses used for analyses.

| Strain                    | Capsid Genotype | Host  | Accession Number | Published Sequence            | Reference                        |
|---------------------------|-----------------|-------|------------------|-------------------------------|----------------------------------|
| AN843                     | GIV.2           | dog   | MK067289         | FL                            | <a href="#">This study</a>       |
| AN1610                    | GIV.2           | dog   | MK067288         | FL                            | <a href="#">This study</a>       |
| AN1638                    | GIV.2           | dog   | MK067290         | FL                            | <a href="#">This study</a>       |
| AN1663                    | GIV.2           | dog   | MK067291         | FL                            | <a href="#">This study</a>       |
| AN1632                    | GVI.1           | dog   | MK067292         | FL                            | <a href="#">This study</a>       |
| AN1633                    | GVI.1           | dog   | MK067293         | FL                            | <a href="#">This study</a>       |
| AN1634                    | GVI.1           | dog   | MK067294         | FL                            | <a href="#">This study</a>       |
| AN1640                    | GVI.2           | dog   | MK067295         | FL                            | <a href="#">This study</a>       |
| AN1655                    | GVI.2           | dog   | MK067297         | SG                            | <a href="#">This study</a>       |
| AN1656                    | GVI.2           | dog   | MK067296         | SG                            | <a href="#">This study</a>       |
| 170                       | GIV.2           | dog   | EU224456         | Partial pol, SG               | Martella et al., 2008            |
| Thessaloniki 30           | GIV.2           | dog   | GU354246         | Partial pol, Partial VP1      | Ntafis et al., 2010              |
| Bari 91                   | GVI.1           | dog   | FJ875027         | Partial pol, SG               | Martella et al., 2008; 2009      |
| FD210                     | GVI.1           | dog   | JF939046         | Partial pol, SG               | Martella, unpublished            |
| 5010                      | GVI.1           | dog   | KY486328         | Partial pol, SG               | Bodnar et al., 2017              |
| 63.15                     | GVI.2           | dog   | KY486329         | Partial pol, SG               | Bodnar et al., 2017              |
| FD53                      | GVI.2           | dog   | JF930689         | Partial pol, SG               | Martella, unpublished            |
| C33 Viseu                 | GVI.2           | dog   | GQ443611         | Partial pol, SG               | Mesquita et al., 2010            |
| Pistoia 387               | GIV.2           | lion  | EF450827         | Partial pol, SG               | Martella et al., 2007            |
| CU081210E                 | GIV.2           | cat   | JF781268         | FL                            | Pinto et al., 2012               |
| M81                       | GIV.2           | cat   | LC389583         | Nearly FL                     | Takano and Hohdatsu, unpublished |
| M49-1                     | GVI.1           | cat   | LC011951         | Nearly complete ORF1          | Takano et al., 2015              |
| M49-1                     | GVI.1           | cat   | LC011950         | VP1                           | Takano and Hohdatsu, unpublished |
| TE 77-13                  | GVI.2           | cat   | KT245136         | Partial pol, SG               | Di Profio et al., unpublished    |
| Lake Macquarie_NSW2680    | GIV.1           | human | JQ613567         | FL                            | Eden et al., 2012                |
| CCDC_GR1113-59            | GIV.1           | human | KC894731         | FL                            | Ao et al., 2014                  |
| Saint Cloud 624           | GIV.1           | human | AF414427         | Partial pol, SG               | Fankhauser et al., unpublished   |
| Fort Lauderdale 560       | GIV.1           | human | AF414426         | Partial pol, SG               | Fankhauser et al., 2002          |
| Alphatron 98-2            | GIV.1           | human | AF195847         | VP1                           | Vinje and Koopmans, 2000         |
| OC01017023                | GIV.1           | human | LC101824         | VP1                           | Seto et al., unpublished         |
| Canet-en-Roussillon H7477 | GIV.1           | human | KT030674         | VP1                           | de Rougemont et al., unpublished |
| Ahrenschoop246            | GIV.1           | human | JQ970479         | Partial pol, VP1, Partial VP2 | Hoehne, unpublished              |
| Rome 283                  | GIV.1           | human | HG004598         | Partial pol, Partial VP1      | Muscillo et al., 2013            |
| Rome 673                  | GIV.1           | human | HG004592         | Partial pol, Partial VP1      | Muscillo et al., 2013            |
| Rome 131                  | GIV.1           | human | HG004588         | Partial pol, Partial VP1      | Muscillo et al., 2013            |
| Rome 675                  | GIV.1           | human | HG004602         | Partial pol, Partial VP1      | Muscillo et al., 2013            |
| Rome 1                    | GIV.1           | human | HG004603         | Partial pol, Partial VP1      | Muscillo et al., 2013            |
| Rome 303                  | GIV.1           | human | HG004604         | Partial pol, Partial VP1      | Muscillo et al., 2013            |
| Rome 301                  | GIV.1           | human | HG004605         | Partial pol, Partial VP1      | Muscillo et al., 2013            |
| Rome 282                  | GIV.1           | human | HG004606         | Partial pol, Partial VP1      | Muscillo et al., 2013            |
| Rome 222                  | GIV.1           | human | HG004607         | Partial pol, Partial VP1      | Muscillo et al., 2013            |
| Rome 267                  | GIV.1           | human | HG004608         | Partial pol, Partial VP1      | Muscillo et al., 2013            |
| WI7002                    | GIV.3           | human | KX907728         | FL                            | Collins et al., 2013             |
| Chiba 040502              | unassigned      | human | AJ844470         | SG                            | Okada et al., 2005               |
| Yuzawa Gira2HS            | unassigned      | human | KJ196291         | FL                            | Park et al., unpublished         |
