# Supplementary material for: Genomics Analyses of GIV and GVI Noroviruses Reveal the Distinct Clustering of Human and Animal Viruses
Source: MDPI journal article supplement (doi:10.3390/v11030204), 2019-03-01
Supplement: s1 [file s1]

**Fig. S1**

**AA Differences Within and Between Genotypes: VP1**

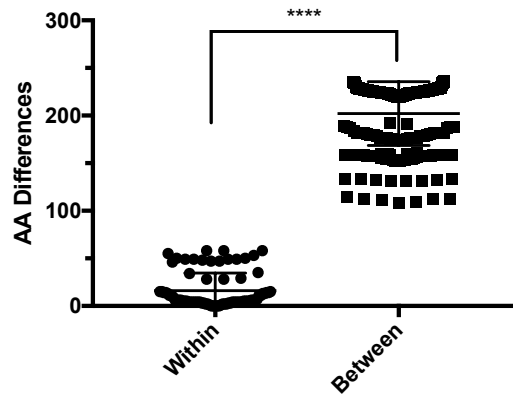

**Supplemental Figure 1.** Number of AA differences within and between genotypes of the complete VP1 of GIV and GVI noroviruses. \*\*\*\* represents  $p < 0.0001$ .
