# Supplementary material for: Genomics Analyses of GIV and GVI Noroviruses Reveal the Distinct Clustering of Human and Animal Viruses
Source: MDPI journal article supplement (doi:10.3390/v11030204), 2019-03-01
Supplement: s1 [file s1]

**Supplemental Table 2.** Amino acid differences within VP1 that differentiate the genotype of GIV noroviruses.

| GIV VP1: Genotype-Specific AA Differences |  | 226 | 286 | 292 | 294 | 296 | 297 | 300 | 326 | 359 | 367 | 370 | 377 | 387 | 401 | 404 | 417 | 437 | 444 | 480 | 520 |
|-------------------------------------------|--|-----|-----|-----|-----|-----|-----|-----|-----|-----|-----|-----|-----|-----|-----|-----|-----|-----|-----|-----|-----|
| Human/GIV.1/Saint Cloud 624               |  | P   | Y   | G   | S   | S   | A   | E   | V   | K   | A   | L   | A   | T   | T   | N   | E   | E   | Q   | E   | N   |
| Human/GIV.1/Fort Lauderdale 560           |  | .   | .   | .   | .   | .   | .   | .   | .   | .   | .   | .   | .   | .   | .   | .   | .   | .   | .   | .   | .   |
| Human/GIV.1/Alphatron 98-2                |  | .   | .   | .   | .   | .   | .   | .   | .   | .   | .   | .   | .   | .   | .   | .   | .   | .   | .   | .   | .   |
| Human/GIV.1/OC01017023                    |  | .   | .   | .   | .   | .   | .   | .   | .   | .   | .   | .   | .   | .   | .   | .   | .   | .   | .   | .   | .   |
| Human/GIV.1/Canet-en-Roussillon H7477     |  | .   | .   | .   | .   | .   | .   | .   | .   | .   | .   | .   | .   | .   | .   | .   | .   | .   | .   | .   | .   |
| Human/GIV.1/CCDC GR1113-59                |  | .   | .   | .   | .   | .   | .   | .   | .   | .   | .   | .   | .   | .   | .   | .   | .   | .   | .   | .   | .   |
| Human/GIV.1/Ahrenschoop246                |  | .   | .   | .   | .   | .   | .   | .   | .   | .   | .   | .   | .   | .   | .   | .   | .   | .   | .   | .   | .   |
| Human/GIV.1/LakeMacquarie NSW268O         |  | .   | .   | .   | .   | .   | .   | .   | .   | .   | .   | .   | .   | .   | .   | .   | .   | .   | .   | .   | .   |
| Human/GIV.3/WI7002                        |  | L   | F   | N   | R   | A   | T   | T   | T   | R   | S   | Q   | M   | V   | I   | R   | K   | V   | A   | A   | S   |
| Cat/GIV.2/CU081210E                       |  | S   | L   | S   | A   | V   | R   | P   | A   | T   | I   | R   | L   | G   | V   | G   | Q   | N   | P   | A   | G   |
| Lion/GIV.2/Pistoia 387                    |  | S   | L   | S   | A   | V   | R   | P   | A   | T   | I   | R   | L   | G   | V   | G   | Q   | N   | P   | A   | G   |
| Dog/GIV.2/170                             |  | S   | L   | S   | A   | V   | R   | P   | A   | T   | I   | R   | L   | G   | V   | G   | Q   | N   | P   | S   | G   |
| Dog/GIV.2/AN843                           |  | S   | L   | S   | A   | V   | R   | P   | A   | T   | I   | R   | L   | G   | V   | G   | Q   | N   | P   | S   | G   |
| Dog/GIV.2/AN1610                          |  | S   | L   | S   | A   | V   | R   | P   | A   | T   | I   | R   | L   | G   | V   | G   | Q   | N   | P   | S   | G   |
| Dog/GIV.2/AN1638                          |  | S   | L   | S   | A   | V   | R   | P   | A   | T   | I   | R   | L   | G   | V   | G   | Q   | N   | P   | S   | G   |
| Dog/GIV.2/AN1663                          |  | S   | L   | S   | A   | V   | R   | P   | A   | T   | I   | R   | L   | G   | V   | G   | Q   | N   | P   | S   | G   |
