# Supplementary material for: Genomics Analyses of GIV and GVI Noroviruses Reveal the Distinct Clustering of Human and Animal Viruses
Source: MDPI journal article supplement (doi:10.3390/v11030204), 2019-03-01
Supplement: s1 [file s1]

**Supplemental Table 3.** Amino acid alignment within VP1 (aa 301-337) of GIV and GVI noroviruses.

|       |                                                | 301 | 302 | 303 | 304 | 305 | 306 | 307 | 308 | 309 | 310 | 311 | 312 | 313 | 314 | 315 | 316 | 317 | 318 | 319 | 320 | 321 | 322 | 323 | 324 | 325 | 326 | 327 | 328 | 329 | 330 | 331 | 332 | 333 | 334 | 335 | 336 | 337 |   |   |   |   |   |   |   |   |   |   |
|-------|------------------------------------------------|-----|-----|-----|-----|-----|-----|-----|-----|-----|-----|-----|-----|-----|-----|-----|-----|-----|-----|-----|-----|-----|-----|-----|-----|-----|-----|-----|-----|-----|-----|-----|-----|-----|-----|-----|-----|-----|---|---|---|---|---|---|---|---|---|---|
| GIV.2 | Cat/GIV.2/USA/2010/CU081210E                   | A   | P   | A   | L   | T   | E   | E   | M   | P   | -   | -   | -   | -   | P   | L   | E   | D   | E   | V   | A   | D   | G   | A   | A   | T   | Y   | T   | L   | A   | R   | A   | A   | D   | T   | T   | L   |     |   |   |   |   |   |   |   |   |   |   |
|       | Cat/GIV.2/JPN/2017/M81                         | .   | .   | .   | .   | .   | .   | .   | .   | .   | -   | -   | -   | -   | .   | .   | .   | .   | .   | .   | .   | .   | .   | .   | .   | .   | .   | .   | .   | .   | .   | .   | .   | .   | .   | .   | .   | .   | . |   |   |   |   |   |   |   |   |   |
|       | Lion/GIV.2/ITA/2006/Pistoia 387                | .   | .   | .   | .   | .   | .   | .   | .   | .   | -   | -   | -   | -   | .   | .   | .   | .   | .   | .   | .   | .   | .   | .   | .   | .   | .   | .   | .   | T   | .   | .   | .   | .   | .   | .   | A   | .   |   |   |   |   |   |   |   |   |   |   |
|       | Dog/GIV.2/ITA/2007/170                         | .   | .   | .   | S   | .   | .   | .   | .   | .   | -   | -   | -   | -   | .   | .   | .   | .   | .   | .   | .   | H   | .   | .   | .   | .   | .   | .   | A   | V   | G   | .   | .   | .   | .   | .   | .   | .   |   |   |   |   |   |   |   |   |   |   |
|       | Dog/GIV.2/USA/2011/AN843                       | .   | .   | .   | P   | S   | .   | .   | .   | .   | -   | -   | -   | -   | .   | .   | .   | .   | .   | .   | .   | .   | .   | V   | .   | D   | .   | A   | I   | G   | .   | .   | .   | .   | .   | .   | .   | .   |   |   |   |   |   |   |   |   |   |   |
|       | Dog/GIV.2/USA/2017/AN1610                      | .   | .   | .   | P   | S   | .   | .   | .   | .   | -   | -   | -   | -   | .   | .   | .   | .   | .   | .   | .   | .   | .   | .   | V   | .   | D   | .   | A   | I   | G   | .   | .   | .   | .   | .   | .   | .   |   |   |   |   |   |   |   |   |   |   |
|       | Dog/GIV.2/USA/2017/AN1638                      | .   | .   | .   | P   | S   | .   | .   | .   | .   | -   | -   | -   | -   | .   | .   | .   | .   | .   | .   | .   | .   | .   | .   | V   | .   | D   | .   | A   | I   | G   | .   | .   | .   | .   | .   | I   | .   |   |   |   |   |   |   |   |   |   |   |
|       | Dog/GIV.2/USA/2017/AN1663                      | .   | .   | .   | P   | S   | .   | .   | .   | .   | -   | -   | -   | -   | .   | .   | .   | .   | .   | .   | .   | .   | .   | .   | V   | .   | D   | .   | A   | I   | G   | .   | .   | .   | .   | .   | I   | .   |   |   |   |   |   |   |   |   |   |   |
| GVI.1 | Cat/GVI.1/JPN/2012/M49-1                       | C   | E   | G   | E   | D   | D   | A   | L   | D   | -   | -   | Q   | A   | S   | .   | G   | A   | .   | P   | I   | R   | D   | Q   | .   | P   | G   | L   | R   | T   | Q   | A   | R   | -   | S   | .   | E   | R   |   |   |   |   |   |   |   |   |   |   |
|       | Dog/GVI.1/ITA/2007/Bari 91                     | C   | E   | G   | E   | E   | S   | .   | V   | N   | -   | -   | T   | T   | .   | T   | D   | S   | G   | A   | T   | G   | D   | Q   | T   | P   | E   | V   | R   | T   | G   | T   | R   | -   | A   | .   | Q   | R   |   |   |   |   |   |   |   |   |   |   |
|       | Dog/GVI.1/ITA/2007/FD210                       | C   | E   | N   | E   | E   | S   | A   | T   | D   | -   | -   | P   | M   | .   | T   | .   | T   | -   | D   | T   | .   | N   | Q   | P   | P   | E   | V   | R   | A   | Q   | A   | R   | -   | A   | .   | Q   | R   |   |   |   |   |   |   |   |   |   |   |
|       | Dog/GVI.1/ITA/2009/5010                        | -   | -   | -   | -   | D   | A   | .   | G   | D   | -   | -   | G   | S   | .   | Q   | .   | A   | S   | D   | G   | E   | D   | E   | C   | Q   | S   | A   | A   | D   | M   | T   | R   | -   | A   | .   | Q   | R   |   |   |   |   |   |   |   |   |   |   |
|       | Dog/GVI.1/USA/2017/AN1632                      | C   | E   | G   | E   | E   | G   | .   | I   | S   | -   | -   | T   | T   | .   | T   | .   | N   | G   | .   | T   | N   | D   | Q   | T   | P   | E   | V   | R   | A   | Q   | P   | R   | -   | A   | .   | Q   | R   |   |   |   |   |   |   |   |   |   |   |
|       | Dog/GVI.1/USA/2017/AN1633                      | C   | E   | G   | E   | E   | G   | .   | I   | S   | -   | -   | T   | T   | .   | T   | .   | N   | G   | .   | T   | N   | D   | Q   | T   | P   | E   | V   | R   | A   | Q   | P   | R   | -   | A   | .   | Q   | R   |   |   |   |   |   |   |   |   |   |   |
|       | Dog/GVI.1/USA/2017/AN1634                      | C   | E   | G   | E   | E   | G   | .   | I   | S   | -   | -   | T   | T   | .   | T   | .   | N   | G   | .   | T   | N   | D   | Q   | T   | P   | E   | V   | R   | A   | Q   | P   | R   | -   | A   | .   | Q   | R   |   |   |   |   |   |   |   |   |   |   |
| GVI.2 | Cat/GVI.2/ITA/2013/TE 77-13                    | G   | L   | G   | W   | D   | -   | -   | -   | -   | -   | -   | -   | -   | -   | L   | .   | A   | T   | T   | L   | V   | D   | G   | P   | E   | A   | R   | V   | Q   | A   | R   | I   | S   | V   | S   | A   |     |   |   |   |   |   |   |   |   |   |   |
|       | Dog/GVI.2/PRT/2007/C33 Viseu                   | G   | V   | D   | H   | .   | D   | Q   | G   | .   | S   | L   | G   | A   | G   | P   | S   | N   | D   | -   | -   | P   | V   | S   | V   | P   | E   | A   | R   | S   | Q   | T   | R   | T   | S   | V   | S   | A   |   |   |   |   |   |   |   |   |   |   |
|       | Dog/GVI.2/ITA/2007/FD53                        | G   | V   | D   | H   | .   | D   | Q   | G   | .   | S   | L   | G   | T   | G   | P   | S   | .   | D   | -   | -   | S   | V   | S   | V   | P   | E   | A   | R   | A   | Q   | T   | R   | T   | G   | V   | S   | A   |   |   |   |   |   |   |   |   |   |   |
|       | Dog/GVI.2/ITA/2015/63.15                       | G   | V   | D   | H   | .   | D   | Q   | G   | L   | P   | L   | G   | T   | G   | P   | S   | .   | D   | -   | -   | S   | T   | S   | .   | P   | E   | V   | R   | A   | Q   | A   | R   | T   | S   | V   | S   | A   |   |   |   |   |   |   |   |   |   |   |
|       | Dog/GVI.2/USA/2017/AN1640                      | G   | V   | D   | H   | .   | D   | H   | N   | S   | P   | P   | R   | A   | E   | S   | L   | .   | T   | T   | I   | P   | T   | D   | G   | P   | E   | T   | R   | A   | Q   | A   | R   | T   | S   | A   | S   | A   |   |   |   |   |   |   |   |   |   |   |
|       | Dog/GVI.2/USA/2017/AN1655                      | G   | V   | D   | H   | .   | D   | H   | N   | .   | P   | P   | Q   | A   | E   | P   | L   | .   | T   | T   | I   | P   | T   | D   | G   | P   | E   | T   | R   | A   | Q   | A   | R   | T   | S   | A   | S   | A   |   |   |   |   |   |   |   |   |   |   |
|       | Dog/GVI.2/USA/2017/AN1656                      | G   | V   | D   | H   | .   | D   | H   | N   | .   | P   | P   | Q   | A   | E   | P   | L   | .   | T   | T   | I   | P   | T   | D   | G   | P   | E   | T   | R   | A   | Q   | A   | R   | T   | S   | A   | S   | A   |   |   |   |   |   |   |   |   |   |   |
| GIV.1 | Human/GIV.1/USA/1998/Saint Cloud 624           | .   | S   | T   | E   | A   | D   | .   | R   | -   | -   | -   | -   | -   | -   | -   | -   | -   | -   | -   | -   | -   | -   | -   | -   | -   | -   | -   | -   | -   | -   | -   | -   | -   | -   | A   | V   | G   | S | F | D | V |   |   |   |   |   |   |
|       | Human/GIV.1/USA/1998/Fort Lauderdale 560       | .   | S   | S   | E   | A   | D   | .   | R   | -   | -   | -   | -   | -   | -   | -   | -   | -   | -   | -   | -   | -   | -   | -   | -   | -   | -   | -   | -   | -   | -   | -   | -   | -   | -   | -   | -   | A   | V | G | S | F | D | V |   |   |   |   |
|       | Human/GIV.1/NET/1998/Alphatron 98-2            | .   | S   | P   | E   | A   | D   | .   | R   | -   | -   | -   | -   | -   | -   | -   | -   | -   | -   | -   | -   | -   | -   | -   | -   | -   | -   | -   | -   | -   | -   | -   | -   | -   | -   | -   | -   | -   | - | A | V | G | S | F | D | V |   |   |
|       | Human/GIV.1/JPN/2001/OC01017023                | .   | S   | P   | E   | A   | D   | .   | R   | -   | -   | -   | -   | -   | -   | -   | -   | -   | -   | -   | -   | -   | -   | -   | -   | -   | -   | -   | -   | -   | -   | -   | -   | -   | -   | -   | -   | -   | - | - | A | V | G | S | F | D | V |   |
|       | Human/GIV.1/FRA/2011/Canet-en-Roussillon H7477 | .   | S   | S   | E   | A   | D   | .   | R   | -   | -   | -   | -   | -   | -   | -   | -   | -   | -   | -   | -   | -   | -   | -   | -   | -   | -   | -   | -   | -   | -   | -   | -   | -   | -   | -   | -   | -   | - | - | A | V | G | S | F | D | V |   |
|       | Human/GIV.1/CHN/2011/CCDC GR1113-59            | .   | S   | P   | E   | A   | D   | .   | R   | -   | -   | -   | -   | -   | -   | -   | -   | -   | -   | -   | -   | -   | -   | -   | -   | -   | -   | -   | -   | -   | -   | -   | -   | -   | -   | -   | -   | -   | - | - | - | A | V | G | S | F | D | V |
|       | Human/GIV.1/DEU/2012/Ahrenschoop246            | .   | S   | S   | E   | A   | D   | .   | R   | -   | -   | -   | -   | -   | -   | -   | -   | -   | -   | -   | -   | -   | -   | -   | -   | -   | -   | -   | -   | -   | -   | -   | -   | -   | -   | -   | -   | -   | - | - | - | A | V | G | S | F | D | V |
|       | Human/GIV.1/AUS/2010/LakeMacquarie NSW2680     | .   | S   | S   | E   | A   | D   | .   | R   | -   | -   | -   | -   | -   | -   | -   | -   | -   | -   | -   | -   | -   | -   | -   | -   | -   | -   | -   | -   | -   | -   | -   | -   | -   | -   | -   | -   | -   | - | - | - | - | A | V | G | S | F | D |
| GIV.3 | Human/GIV.3/USA/2016/WI7002                    | S   | T   | T   | E   | .   | -   | -   | -   | -   | -   | -   | -   | -   | -   | -   | -   | -   | -   | -   | -   | -   | -   | -   | -   | -   | -   | -   | -   | -   | -   | -   | -   | -   | -   | -   | -   | -   | - | - | - | - | T | G | . | . | D |   |
