# Supplementary material for: Genomics Analyses of GIV and GVI Noroviruses Reveal the Distinct Clustering of Human and Animal Viruses
Source: MDPI journal article supplement (doi:10.3390/v11030204), 2019-03-01
Supplement: s1 [file s1]

**Supplemental Table 4.** Number of amino acid differences (% differences) of the complete polymerase (total of 511 residues) within and between species.

|        | No. | Human         | Canine      | Feline    |
|--------|-----|---------------|-------------|-----------|
| Human  | 3   | 28 (5.5%)     |             |           |
| Canine | 8   | 116.3 (22.8%) | 9.9 (1.9%)  |           |
| Feline | 2   | 115.3 (22.6%) | 20.4 (4.0%) | 11 (2.2%) |
